# Supplementary material for: Conformational stabilities of dicyclopropyl ketone determined from variable temperature infrared spectra of xenon solutions and ab initio calculationsElectronic supplementary information (ESI) available: Calculated energies, diagonal force constants, symmetry coordinates and calculated asymmetric torsional potential function. See http://www.rsc.org/suppdata/cp/b4/b400142g/
Source: Royal Society of Chemistry journal article supplement (doi:10.1039/b400142g), 2004-01-01
Supplement: b400142g.pdf [file b400142g.pdf]

## SUPPLEMENTAL MATERIAL

**Table 1S.** Scaled diagonal force constants from MP2/6-31G(d) *ab initio* calculations for dicyclopropyl ketone.

**Table 2S.** Symmetry coordinates for dicyclopropyl ketone.

**Fig. 1S.** Asymmetric torsional potential function for dicyclopropyl ketone. Solid curve is the calculated potential function at MP2(full)/6-31G(d) level; dotted curve is calculated at MP2(full)/6-31+G(d) level. Torsional dihedral angle of 0° corresponds to the *cis-cis* conformer.

**TABLE 1S.** Calculated energies (Hartree) and energy differences ( $\text{cm}^{-1}$ ) for the two conformers of dicyclopropyl ketone.

| Method / Basis set     | <i>cis-cis</i> | <i>cis-trans</i> | $\Delta E$ |
|------------------------|----------------|------------------|------------|
| RHF/6-31G(d)           | -345.706689    | -345.702818      | 850        |
| RHF/6-31+G(d)          | -345.713051    | -345.709741      | 726        |
| MP2/6-31G(d)           | -346.820603    | -346.816696      | 857        |
| MP2/6-31+G(d)          | -346.841661    | -346.838581      | 676        |
| MP2/6-311G(d,p)        | -347.140389    | -347.137121      | 717        |
| MP2/6-311+G(d,p)       | -347.149730    | -347.147381      | 516        |
| MP2/6-311G(2d,2p)      | -347.232147    | -347.229067      | 676        |
| MP2/6-311+G(2d,2p)     | -347.239367    | -347.237182      | 480        |
| B3LYP/6-31G(d)         | -347.931942    | -347.928081      | 847        |
| B3LYP/6-31+G(d)        | -347.945432    | -347.942169      | 716        |
| B3LYP/6-311G(d,p)      | -348.025697    | -348.021809      | 853        |
| B3LYP/6-311+G(d,p)     | -348.029984    | -348.026825      | 693        |
| B3LYP/6-311G(2d,2p)    | -348.038211    | -348.034417      | 833        |
| B3LYP/6-311+G(2d,2p)   | -348.042254    | -348.039141      | 683        |
| B3LYP/6-311G(2df,2pd)  | -348.049398    | -348.045607      | 832        |
| B3LYP/6-311+G(2df,2pd) | -348.053104    | -348.050015      | 678        |

**TABLE 2S.** Scaled<sup>a</sup> diagonal force constants from MP2/6-31G(d) *ab initio* calculations for dicyclopropyl ketone.

| Stretches (mdyn·Å <sup>-1</sup> )                                 |                |                  | Bends (mdyn·Å·rad <sup>-2</sup> )                                                                |                |                  |
|-------------------------------------------------------------------|----------------|------------------|--------------------------------------------------------------------------------------------------|----------------|------------------|
| Parameter                                                         | <i>cis-cis</i> | <i>cis-trans</i> | Parameter                                                                                        | <i>cis-cis</i> | <i>cis-trans</i> |
| C=O                                                               | 11.012         | 11.081           | OC <sub>1</sub> C <sub>3</sub>                                                                   | 0.721          | 0.747            |
| C <sub>1</sub> -C <sub>3</sub>                                    | 4.558          | 4.425            | OC <sub>1</sub> C <sub>4</sub>                                                                   | 0.721          | 0.692            |
| C <sub>1</sub> -C <sub>4</sub>                                    | 4.558          | 4.506            | C <sub>3</sub> C <sub>1</sub> C <sub>4</sub>                                                     | 0.595          | 0.692            |
| C <sub>3</sub> -C <sub>7,8</sub>                                  | 1.780          | 1.792            | C <sub>1</sub> C <sub>3</sub> C <sub>7,8</sub>                                                   | 0.841          | 0.871            |
| C <sub>7</sub> -C <sub>8</sub>                                    | 2.006          | 2.000            | C <sub>3</sub> C <sub>7</sub> C <sub>8</sub> , C <sub>3</sub> C <sub>8</sub> C <sub>7</sub>      | 0.651          | 0.656            |
| C <sub>4</sub> -C <sub>9,10</sub>                                 | 1.780          | 1.769            | C <sub>7</sub> C <sub>3</sub> C <sub>8</sub>                                                     | 0.714          | 0.714            |
| C <sub>9</sub> -C <sub>10</sub>                                   | 2.006          | 1.965            | C <sub>1</sub> C <sub>4</sub> C <sub>9,10</sub>                                                  | 0.841          | 0.793            |
| C <sub>3</sub> -H <sub>5</sub>                                    | 5.071          | 5.098            | C <sub>4</sub> C <sub>9</sub> C <sub>10</sub> , C <sub>4</sub> C <sub>10</sub> C <sub>9</sub>    | 0.651          | 0.645            |
| C <sub>4</sub> -H <sub>6</sub>                                    | 5.071          | 5.080            | C <sub>9</sub> C <sub>4</sub> C <sub>10</sub>                                                    | 0.714          | 0.692            |
| C <sub>7</sub> -H <sub>11</sub> , C <sub>8</sub> -H <sub>13</sub> | 5.153          | 5.157            | C <sub>1</sub> C <sub>3</sub> H <sub>5</sub>                                                     | 0.301          | 0.303            |
| C <sub>7</sub> -H <sub>12</sub> , C <sub>8</sub> -H <sub>14</sub> | 5.134          | 5.130            | C <sub>1</sub> C <sub>4</sub> H <sub>6</sub>                                                     | 0.301          | 0.301            |
| C <sub>9</sub> -H <sub>15</sub> C <sub>10</sub> -H <sub>17</sub>  | 5.153          | 5.141            | C <sub>7,8</sub> C <sub>3</sub> H <sub>5</sub>                                                   | 0.647          | 0.659            |
| C <sub>9</sub> -H <sub>16</sub> C <sub>10</sub> -H <sub>18</sub>  | 5.134          | 5.133            | C <sub>3</sub> C <sub>7</sub> H <sub>11</sub> , C <sub>3</sub> C <sub>8</sub> H <sub>13</sub>    | 0.703          | 0.704            |
|                                                                   |                |                  | C <sub>3</sub> C <sub>7</sub> H <sub>12</sub> , C <sub>3</sub> C <sub>8</sub> H <sub>14</sub>    | 0.650          | 0.651            |
|                                                                   |                |                  | C <sub>8</sub> C <sub>7</sub> H <sub>11</sub> , C <sub>7</sub> C <sub>8</sub> H <sub>13</sub>    | 0.638          | 0.643            |
|                                                                   |                |                  | C <sub>8</sub> C <sub>7</sub> H <sub>12</sub> , C <sub>7</sub> C <sub>8</sub> H <sub>14</sub>    | 0.593          | 0.597            |
|                                                                   |                |                  | C <sub>9,10</sub> C <sub>4</sub> H <sub>6</sub>                                                  | 0.647          | 0.693            |
|                                                                   |                |                  | C <sub>4</sub> C <sub>9</sub> H <sub>15</sub> , C <sub>4</sub> C <sub>10</sub> H <sub>17</sub>   | 0.703          | 0.649            |
|                                                                   |                |                  | C <sub>4</sub> C <sub>9</sub> H <sub>16</sub> , C <sub>4</sub> C <sub>10</sub> H <sub>18</sub>   | 0.650          | 0.647            |
|                                                                   |                |                  | C <sub>10</sub> C <sub>9</sub> H <sub>15</sub> , C <sub>9</sub> C <sub>10</sub> H <sub>17</sub>  | 0.638          | 0.603            |
|                                                                   |                |                  | C <sub>10</sub> C <sub>9</sub> H <sub>16</sub> , C <sub>9</sub> C <sub>10</sub> H <sub>18</sub>  | 0.593          | 0.606            |
|                                                                   |                |                  | H <sub>11</sub> C <sub>7</sub> H <sub>12</sub> , H <sub>13</sub> C <sub>8</sub> H <sub>14</sub>  | 0.242          | 0.242            |
|                                                                   |                |                  | H <sub>15</sub> C <sub>9</sub> H <sub>16</sub> , H <sub>17</sub> C <sub>10</sub> H <sub>18</sub> | 0.242          | 0.249            |
|                                                                   |                |                  | C=O out-of-plane bend                                                                            | 0.533          | 0.521            |
|                                                                   |                |                  | C <sub>1</sub> C <sub>3</sub> torsion                                                            | 0.002          | 0.003            |
|                                                                   |                |                  | C <sub>1</sub> C <sub>4</sub> torsion                                                            | 0.002          | 0.006            |

<sup>a</sup> With scaling factors of 0.88 for CH stretches and 0.90 for all other modes.

**TABLE 3S.** Symmetry coordinates for dicyclopropyl ketone.

| <i>cis-cis</i><br>(C <sub>2v</sub> ) | <i>cis-trans</i><br>(C <sub>s</sub> ) | Description                           | Symmetry Coordinate <sup>a</sup>                                                                                                                                                                                                                                                                                                                                           |
|--------------------------------------|---------------------------------------|---------------------------------------|----------------------------------------------------------------------------------------------------------------------------------------------------------------------------------------------------------------------------------------------------------------------------------------------------------------------------------------------------------------------------|
| A <sub>1</sub>                       | A'                                    | CH <sub>2</sub> antisymmetric stretch | S <sub>1</sub> = r <sub>3</sub> - r <sub>4</sub> + r <sub>5</sub> - r <sub>6</sub> + r <sub>7</sub> - r <sub>8</sub> + r <sub>9</sub> - r <sub>10</sub>                                                                                                                                                                                                                    |
| A <sub>1</sub>                       | A'                                    | CH stretch                            | S <sub>2</sub> = r <sub>1</sub> + r <sub>2</sub>                                                                                                                                                                                                                                                                                                                           |
| A <sub>1</sub>                       | A'                                    | CH <sub>2</sub> symmetric stretch     | S <sub>3</sub> = r <sub>3</sub> + r <sub>4</sub> + r <sub>5</sub> + r <sub>6</sub> + r <sub>7</sub> + r <sub>8</sub> + r <sub>9</sub> + r <sub>10</sub>                                                                                                                                                                                                                    |
| A <sub>1</sub>                       | A'                                    | C=O stretch                           | S <sub>4</sub> = R                                                                                                                                                                                                                                                                                                                                                         |
| A <sub>1</sub>                       | A'                                    | CH <sub>2</sub> deformation           | S <sub>5</sub> = 4ε <sub>1</sub> - α <sub>1</sub> - α <sub>2</sub> - α <sub>3</sub> - α <sub>4</sub> + 4ε <sub>2</sub> - β <sub>1</sub> - β <sub>2</sub> - β <sub>3</sub> - β <sub>4</sub><br>+ 4ε <sub>3</sub> - γ <sub>1</sub> - γ <sub>2</sub> - γ <sub>3</sub> - γ <sub>4</sub> + 4ε <sub>4</sub> - δ <sub>1</sub> - δ <sub>2</sub> - δ <sub>3</sub> - δ <sub>4</sub>  |
| A <sub>1</sub>                       | A'                                    | CH in-plane bend                      | S <sub>6</sub> = 2ξ <sub>1</sub> - η <sub>1</sub> - η <sub>2</sub> + 2ξ <sub>2</sub> - θ <sub>1</sub> - θ <sub>2</sub>                                                                                                                                                                                                                                                     |
| A <sub>1</sub>                       | A'                                    | Ring breathing                        | S <sub>7</sub> = R <sub>3</sub> + R <sub>4</sub> + R <sub>5</sub> + R <sub>6</sub> + R <sub>7</sub> + R <sub>8</sub>                                                                                                                                                                                                                                                       |
| A <sub>1</sub>                       | A'                                    | CC(O)C symmetric stretch              | S <sub>8</sub> = R <sub>1</sub> + R <sub>2</sub>                                                                                                                                                                                                                                                                                                                           |
| A <sub>1</sub>                       | A'                                    | CH <sub>2</sub> wag                   | S <sub>9</sub> = α <sub>1</sub> + α <sub>2</sub> - α <sub>3</sub> - α <sub>4</sub> + β <sub>1</sub> + β <sub>2</sub> - β <sub>3</sub> - β <sub>4</sub> + γ <sub>1</sub> + γ <sub>2</sub> -<br>γ <sub>3</sub> - γ <sub>4</sub> + δ <sub>1</sub> + δ <sub>2</sub> - δ <sub>3</sub> - δ <sub>4</sub>                                                                          |
| A <sub>1</sub>                       | A'                                    | Ring deformation                      | S <sub>10</sub> = 2R <sub>5</sub> - R <sub>3</sub> - R <sub>4</sub> + 2R <sub>8</sub> - R <sub>6</sub> - R <sub>7</sub>                                                                                                                                                                                                                                                    |
| A <sub>1</sub>                       | A'                                    | CH <sub>2</sub> rock                  | S <sub>11</sub> = α <sub>1</sub> - α <sub>2</sub> + α <sub>3</sub> - α <sub>4</sub> + β <sub>1</sub> - β <sub>2</sub> + β <sub>3</sub> - β <sub>4</sub> + γ <sub>1</sub> - γ <sub>2</sub> +<br>γ <sub>3</sub> - γ <sub>4</sub> + δ <sub>1</sub> - δ <sub>2</sub> + δ <sub>3</sub> - δ <sub>4</sub>                                                                         |
| A <sub>1</sub>                       | A'                                    | CH <sub>2</sub> twist                 | S <sub>12</sub> = α <sub>1</sub> - α <sub>2</sub> - α <sub>3</sub> + α <sub>4</sub> + β <sub>1</sub> - β <sub>2</sub> - β <sub>3</sub> + β <sub>4</sub> + γ <sub>1</sub> - γ <sub>2</sub> -<br>γ <sub>3</sub> + γ <sub>4</sub> + δ <sub>1</sub> - δ <sub>2</sub> - δ <sub>3</sub> + δ <sub>4</sub>                                                                         |
| A <sub>1</sub>                       | A'                                    | CC(O)C bend                           | S <sub>13</sub> = 2λ - κ <sub>1</sub> - κ <sub>2</sub>                                                                                                                                                                                                                                                                                                                     |
| A <sub>1</sub>                       | A'                                    | Ring-C in-plane bend                  | S <sub>14</sub> = μ <sub>1</sub> + μ <sub>2</sub> + ν <sub>1</sub> + ν <sub>2</sub>                                                                                                                                                                                                                                                                                        |
| A <sub>2</sub>                       | A''                                   | CH <sub>2</sub> antisymmetric stretch | S <sub>15</sub> = r <sub>3</sub> - r <sub>4</sub> - r <sub>5</sub> + r <sub>6</sub> - r <sub>7</sub> + r <sub>8</sub> + r <sub>9</sub> - r <sub>10</sub>                                                                                                                                                                                                                   |
| A <sub>2</sub>                       | A''                                   | CH <sub>2</sub> symmetric stretch     | S <sub>16</sub> = r <sub>3</sub> + r <sub>4</sub> - r <sub>5</sub> - r <sub>6</sub> - r <sub>7</sub> - r <sub>8</sub> + r <sub>9</sub> + r <sub>10</sub>                                                                                                                                                                                                                   |
| A <sub>2</sub>                       | A''                                   | CH <sub>2</sub> deformation           | S <sub>17</sub> = 4ε <sub>1</sub> - α <sub>1</sub> - α <sub>2</sub> - α <sub>3</sub> - α <sub>4</sub> - 4ε <sub>2</sub> + β <sub>1</sub> + β <sub>2</sub> + β <sub>3</sub> + β <sub>4</sub><br>- 4ε <sub>3</sub> + γ <sub>1</sub> + γ <sub>2</sub> + γ <sub>3</sub> + γ <sub>4</sub> + 4ε <sub>4</sub> - δ <sub>1</sub> - δ <sub>2</sub> - δ <sub>3</sub> - δ <sub>4</sub> |
| A <sub>2</sub>                       | A''                                   | CH <sub>2</sub> twist                 | S <sub>18</sub> = α <sub>1</sub> - α <sub>2</sub> - α <sub>3</sub> + α <sub>4</sub> - β <sub>1</sub> + β <sub>2</sub> + β <sub>3</sub> - β <sub>4</sub> - γ <sub>1</sub> + γ <sub>2</sub> +<br>γ <sub>3</sub> - γ <sub>4</sub> + δ <sub>1</sub> - δ <sub>2</sub> - δ <sub>3</sub> + δ <sub>4</sub>                                                                         |
| A <sub>2</sub>                       | A''                                   | CH out-of-plane bend                  | S <sub>19</sub> = η <sub>1</sub> - η <sub>2</sub> - θ <sub>1</sub> + θ <sub>2</sub>                                                                                                                                                                                                                                                                                        |
| A <sub>2</sub>                       | A''                                   | CH <sub>2</sub> wag                   | S <sub>20</sub> = α <sub>1</sub> + α <sub>2</sub> - α <sub>3</sub> - α <sub>4</sub> - β <sub>1</sub> - β <sub>2</sub> + β <sub>3</sub> + β <sub>4</sub> - γ <sub>1</sub> - γ <sub>2</sub> +<br>γ <sub>3</sub> + γ <sub>4</sub> + δ <sub>1</sub> + δ <sub>2</sub> - δ <sub>3</sub> - δ <sub>4</sub>                                                                         |
| A <sub>2</sub>                       | A''                                   | CH <sub>2</sub> rock                  | S <sub>21</sub> = α <sub>1</sub> - α <sub>2</sub> + α <sub>3</sub> - α <sub>4</sub> - β <sub>1</sub> + β <sub>2</sub> - β <sub>3</sub> + β <sub>4</sub> - γ <sub>1</sub> + γ <sub>2</sub> -<br>γ <sub>3</sub> + γ <sub>4</sub> + δ <sub>1</sub> - δ <sub>2</sub> + δ <sub>3</sub> - δ <sub>4</sub>                                                                         |
| A <sub>2</sub>                       | A''                                   | Ring deformation                      | S <sub>22</sub> = R <sub>3</sub> - R <sub>4</sub> - R <sub>6</sub> + R <sub>7</sub>                                                                                                                                                                                                                                                                                        |
| A <sub>2</sub>                       | A''                                   | Ring-C out-of-plane bend              | S <sub>23</sub> = μ <sub>1</sub> - μ <sub>2</sub> - ν <sub>1</sub> + ν <sub>2</sub>                                                                                                                                                                                                                                                                                        |
| A <sub>2</sub>                       | A''                                   | Torsion                               | S <sub>24</sub> = τ <sub>1</sub> + τ <sub>2</sub>                                                                                                                                                                                                                                                                                                                          |
| B <sub>1</sub>                       | A''                                   | CH <sub>2</sub> antisymmetric stretch | S <sub>25</sub> = r <sub>3</sub> - r <sub>4</sub> - r <sub>5</sub> + r <sub>6</sub> + r <sub>7</sub> - r <sub>8</sub> - r <sub>9</sub> + r <sub>10</sub>                                                                                                                                                                                                                   |
| B <sub>1</sub>                       | A''                                   | CH <sub>2</sub> symmetric stretch     | S <sub>26</sub> = r <sub>3</sub> + r <sub>4</sub> - r <sub>5</sub> - r <sub>6</sub> + r <sub>7</sub> + r <sub>8</sub> - r <sub>9</sub> - r <sub>10</sub>                                                                                                                                                                                                                   |
| B <sub>1</sub>                       | A''                                   | CH <sub>2</sub> deformation           | S <sub>27</sub> = 4ε <sub>1</sub> - α <sub>1</sub> - α <sub>2</sub> - α <sub>3</sub> - α <sub>4</sub> - 4ε <sub>2</sub> + β <sub>1</sub> + β <sub>2</sub> + β <sub>3</sub> + β <sub>4</sub><br>+ 4ε <sub>3</sub> - γ <sub>1</sub> - γ <sub>2</sub> - γ <sub>3</sub> - γ <sub>4</sub> - 4ε <sub>4</sub> + δ <sub>1</sub> + δ <sub>2</sub> + δ <sub>3</sub> + δ <sub>4</sub> |
| B <sub>1</sub>                       | A''                                   | CH <sub>2</sub> twist                 | S <sub>28</sub> = α <sub>1</sub> - α <sub>2</sub> - α <sub>3</sub> + α <sub>4</sub> - β <sub>1</sub> + β <sub>2</sub> + β <sub>3</sub> - β <sub>4</sub> + γ <sub>1</sub> - γ <sub>2</sub> -<br>γ <sub>3</sub> + γ <sub>4</sub> - δ <sub>1</sub> + δ <sub>2</sub> + δ <sub>3</sub> - δ <sub>4</sub>                                                                         |

|                |     |                                       |                   |                                                                                                                                                                                                                                                 |
|----------------|-----|---------------------------------------|-------------------|-------------------------------------------------------------------------------------------------------------------------------------------------------------------------------------------------------------------------------------------------|
| B <sub>1</sub> | A'' | CH out-of-plane bend                  | S <sub>29</sub> = | $\eta_1 - \eta_2 + \theta_1 - \theta_2$                                                                                                                                                                                                         |
| B <sub>1</sub> | A'' | CH <sub>2</sub> wag                   | S <sub>30</sub> = | $\alpha_1 + \alpha_2 - \alpha_3 - \alpha_4 - \beta_1 - \beta_2 + \beta_3 + \beta_4 + \gamma_1 + \gamma_2 - \gamma_3 - \gamma_4 - \delta_1 - \delta_2 + \delta_3 + \delta_4$                                                                     |
| B <sub>1</sub> | A'' | CH <sub>2</sub> rock                  | S <sub>31</sub> = | $\alpha_1 - \alpha_2 + \alpha_3 - \alpha_4 - \beta_1 + \beta_2 - \beta_3 + \beta_4 + \gamma_1 - \gamma_2 + \gamma_3 - \gamma_4 - \delta_1 + \delta_2 - \delta_3 + \delta_4$                                                                     |
| B <sub>1</sub> | A'' | Ring deformation                      | S <sub>32</sub> = | $R_3 - R_4 + R_6 - R_7$                                                                                                                                                                                                                         |
| B <sub>1</sub> | A'' | C=O out-of-plane bend                 | S <sub>33</sub> = | $\omega$                                                                                                                                                                                                                                        |
| B <sub>1</sub> | A'' | Ring-C out-of-plane bend              | S <sub>34</sub> = | $\mu_1 - \mu_2 + \nu_1 - \nu_2$                                                                                                                                                                                                                 |
| B <sub>1</sub> | A'' | Torsion                               | S <sub>35</sub> = | $\tau_1 - \tau_2$                                                                                                                                                                                                                               |
| B <sub>2</sub> | A'  | CH <sub>2</sub> antisymmetric stretch | S <sub>36</sub> = | $r_3 - r_4 + r_5 - r_6 - r_7 + r_8 - r_9 + r_{10}$                                                                                                                                                                                              |
| B <sub>2</sub> | A'  | CH <sub>2</sub> symmetric stretch     | S <sub>37</sub> = | $r_3 + r_4 + r_5 + r_6 - r_7 - r_8 - r_9 - r_{10}$                                                                                                                                                                                              |
| B <sub>2</sub> | A'  | CH stretch                            | S <sub>38</sub> = | $r_1 - r_2$                                                                                                                                                                                                                                     |
| B <sub>2</sub> | A'  | CH <sub>2</sub> deformation           | S <sub>39</sub> = | $4\varepsilon_1 - \alpha_1 - \alpha_2 - \alpha_3 - \alpha_4 + 4\varepsilon_2 - \beta_1 - \beta_2 - \beta_3 - \beta_4 - 4\varepsilon_3 + \gamma_1 + \gamma_2 + \gamma_3 + \gamma_4 - 4\varepsilon_4 + \delta_1 + \delta_2 + \delta_3 + \delta_4$ |
| B <sub>2</sub> | A'  | CH in-plane bend                      | S <sub>40</sub> = | $2\xi_1 - \eta_1 - \eta_2 - 2\xi_2 + \theta_1 + \theta_2$                                                                                                                                                                                       |
| B <sub>2</sub> | A'  | Ring breathing                        | S <sub>41</sub> = | $R_3 + R_4 + R_5 - R_6 - R_7 - R_8$                                                                                                                                                                                                             |
| B <sub>2</sub> | A'  | CC(O)C antisymmetric stretch          | S <sub>42</sub> = | $R_1 - R_2$                                                                                                                                                                                                                                     |
| B <sub>2</sub> | A'  | CH <sub>2</sub> twist                 | S <sub>43</sub> = | $\alpha_1 - \alpha_2 - \alpha_3 + \alpha_4 + \beta_1 - \beta_2 - \beta_3 + \beta_4 - \gamma_1 + \gamma_2 + \gamma_3 - \gamma_4 - \delta_1 + \delta_2 + \delta_3 - \delta_4$                                                                     |
| B <sub>2</sub> | A'  | CH <sub>2</sub> wag                   | S <sub>44</sub> = | $\alpha_1 + \alpha_2 - \alpha_3 - \alpha_4 + \beta_1 + \beta_2 - \beta_3 - \beta_4 - \gamma_1 - \gamma_2 + \gamma_3 + \gamma_4 - \delta_1 - \delta_2 + \delta_3 + \delta_4$                                                                     |
| B <sub>2</sub> | A'  | Ring deformation                      | S <sub>45</sub> = | $2R_5 - R_3 - R_4 - 2R_8 + R_6 + R_7$                                                                                                                                                                                                           |
| B <sub>2</sub> | A'  | CH <sub>2</sub> rock                  | S <sub>46</sub> = | $\alpha_1 - \alpha_2 + \alpha_3 - \alpha_4 + \beta_1 - \beta_2 + \beta_3 - \beta_4 - \gamma_1 + \gamma_2 - \gamma_3 + \gamma_4 - \delta_1 + \delta_2 - \delta_3 + \delta_4$                                                                     |
| B <sub>2</sub> | A'  | C=O in-plane bend                     | S <sub>47</sub> = | $\kappa_1 - \kappa_2$                                                                                                                                                                                                                           |
| B <sub>2</sub> | A'  | Ring-C in-plane bend                  | S <sub>48</sub> = | $\mu_1 + \mu_2 - \nu_1 - \nu_2$                                                                                                                                                                                                                 |

<sup>a</sup> Not normalized.

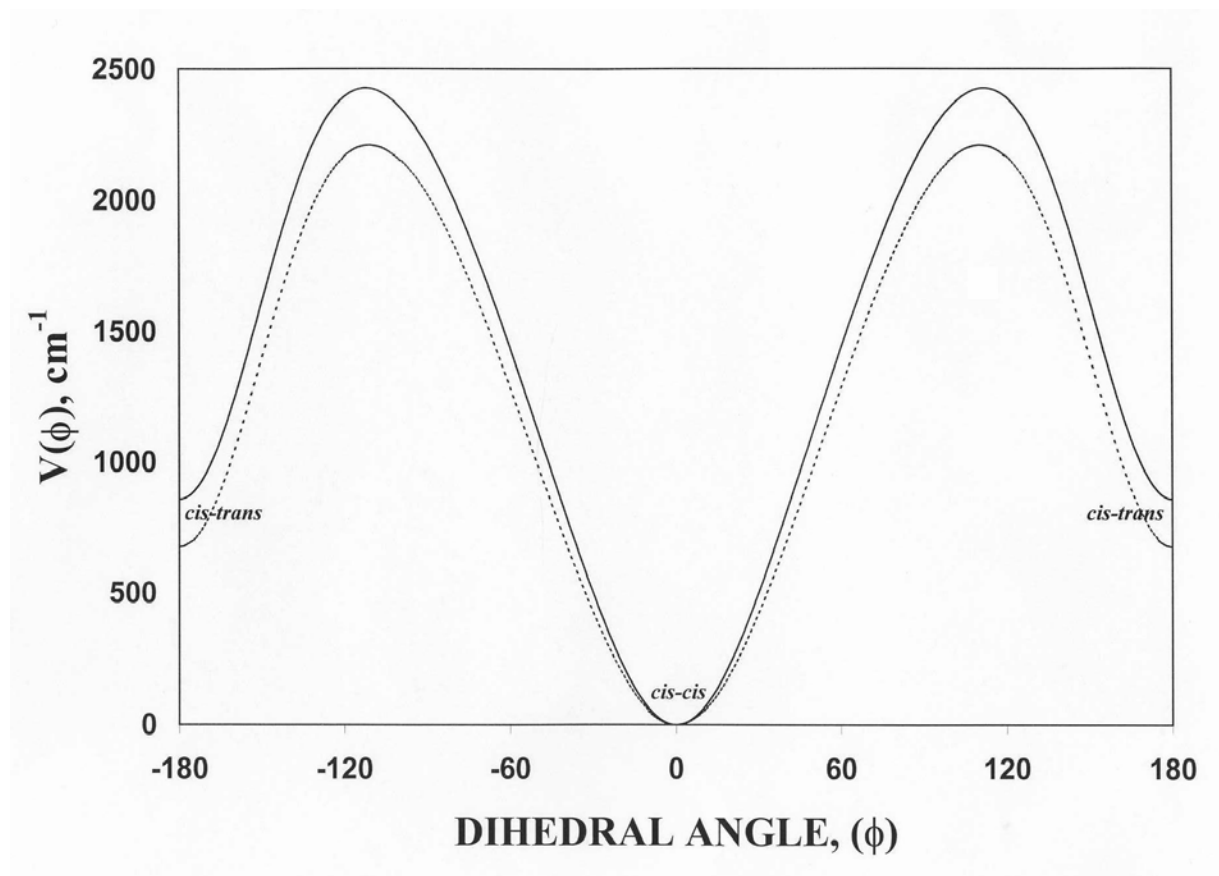

Fig. 1S
